# Supplementary material
Source: PubMed Central journal article supplement (PMC8687626)
Supplement: NIHMS1758854-supplement-Supplementary_Material.pdf [file NIHMS1758854-supplement-Supplementary_Material.pdf]

## Electronic Supplementary Material

**Title:** Differences in functional and structural social support among female and male veterans and civilians

**Journal:** *Social Psychiatry and Psychiatric Epidemiology*

**Authors:** Sarah B. Campbell, PhD, Kristen E. Gray, PhD, MS, Katherine D. Hoerster, PhD, MPH, John C. Fortney, PhD, Tracy L. Simpson, PhD

**Corresponding Author:** Sarah Campbell, PhD, 1660 S Columbia Way, S-152, Seattle, WA 98108; [Sarah.Campbell6@va.gov](mailto:Sarah.Campbell6@va.gov); 206-716-5789, ext 65789

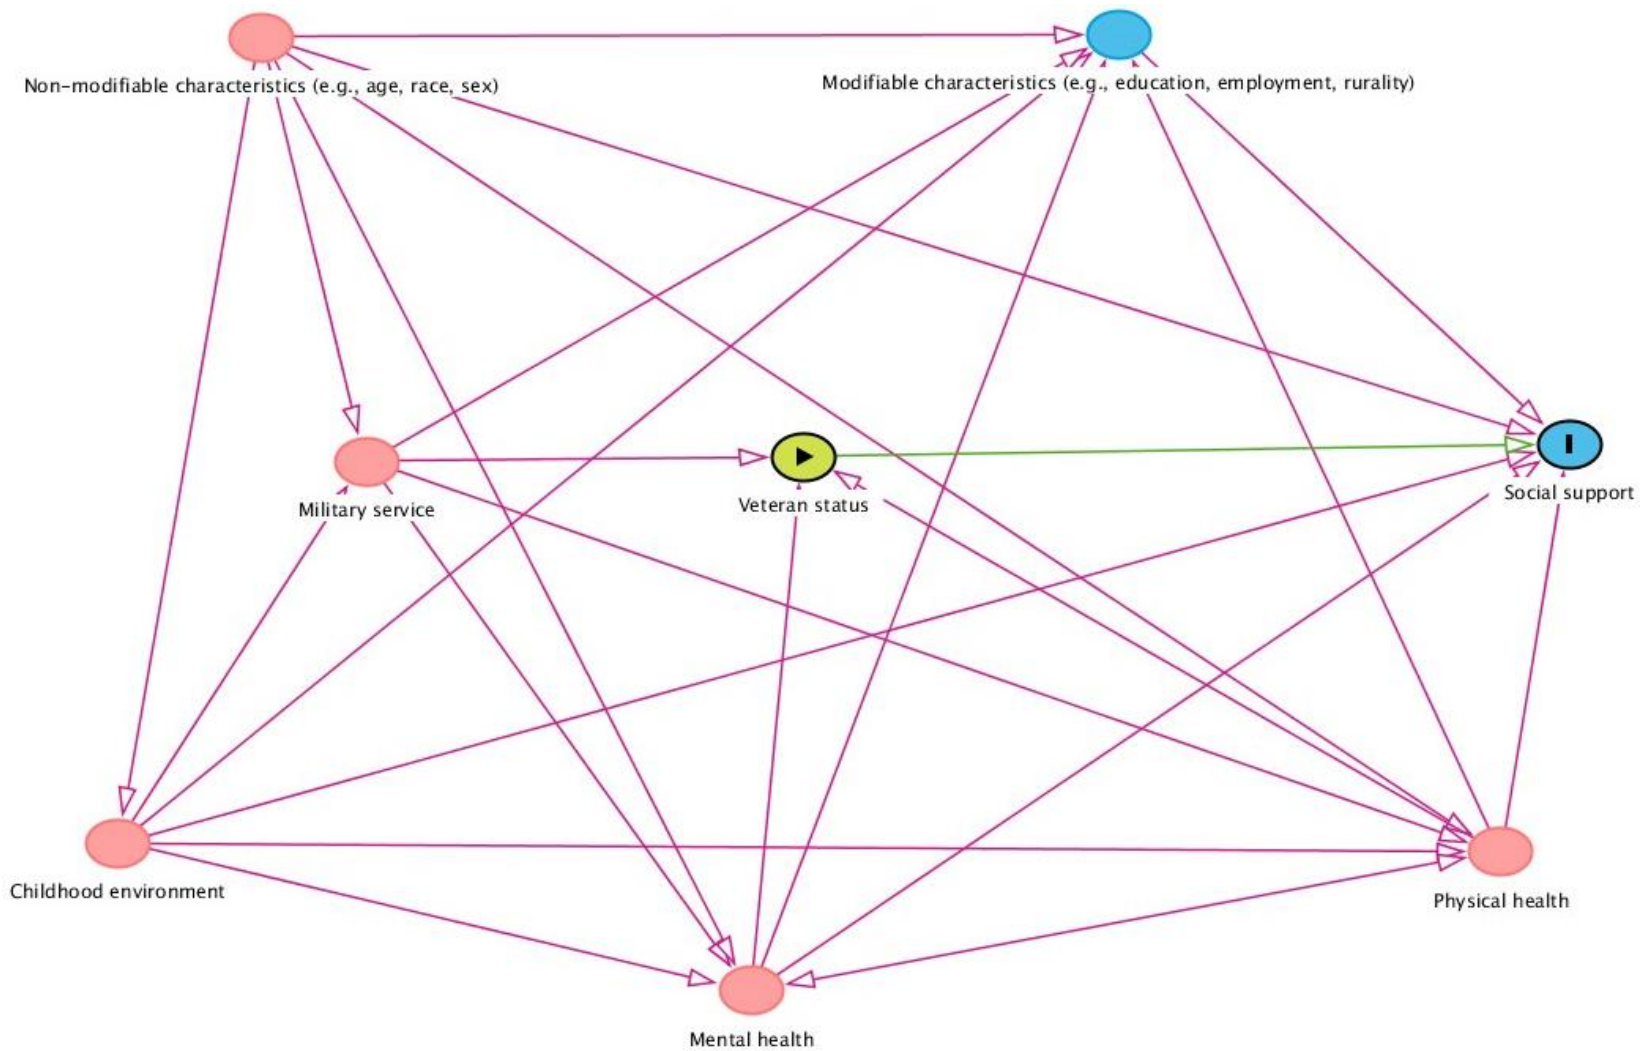

Online Resource 1. Directed acyclic graph (DAG) demonstrating relationships among veteran status (exposure), social support (outcome), and selected covariates. The DAG was used to identify the minimal set of adjustment variables necessary to produce unbiased estimates of differences in functional and structural social support between veterans and non-veterans.

**Online Resource 2. Unadjusted mean social support scores of NESARC-III respondents by veteran status and sex<sup>a</sup>**

| Social Support Measure                      | Civilians |      | Veterans |      | Men   |      |       |      | Women |      |       |      |
|---------------------------------------------|-----------|------|----------|------|-------|------|-------|------|-------|------|-------|------|
|                                             | Mean      | SE   | Mean     | SE   | Mean  | SE   | Mean  | SE   | Mean  | SE   | Mean  | SE   |
| <b>Structural social support</b>            |           |      |          |      |       |      |       |      |       |      |       |      |
| <i>Social network diversity</i>             | 5.30      | 0.02 | 5.00     | 0.05 | 5.25  | 0.03 | 4.97  | 0.05 | 5.33  | 0.02 | 5.22  | 0.12 |
| <i>Social network size: total</i>           | 18.72     | 0.19 | 18.70    | 0.40 | 19.06 | 0.27 | 18.95 | 0.44 | 18.46 | 0.20 | 16.49 | 0.72 |
| <i>Social network size: specific groups</i> |           |      |          |      |       |      |       |      |       |      |       |      |
| Family                                      | 5.79      | 0.05 | 5.26     | 0.09 | 5.35  | 0.06 | 5.21  | 0.10 | 6.13  | 0.06 | 5.67  | 0.30 |
| Friends                                     | 4.32      | 0.05 | 4.49     | 0.12 | 4.51  | 0.07 | 4.56  | 0.13 | 4.18  | 0.05 | 3.88  | 0.25 |
| Students                                    | 0.66      | 0.03 | 0.19     | 0.03 | 0.74  | 0.06 | 0.18  | 0.03 | 0.60  | 0.03 | 0.33  | 0.09 |
| Coworkers                                   | 2.01      | 0.04 | 1.57     | 0.10 | 2.52  | 0.07 | 1.61  | 0.11 | 1.62  | 0.04 | 1.23  | 0.14 |
| Neighbors                                   | 1.47      | 0.02 | 2.03     | 0.08 | 1.51  | 0.03 | 2.08  | 0.08 | 1.44  | 0.03 | 1.64  | 0.17 |
| Volunteers                                  | 0.98      | 0.04 | 1.33     | 0.11 | 0.92  | 0.05 | 1.40  | 0.12 | 1.02  | 0.05 | 0.63  | 0.12 |
| Other groups                                | 0.99      | 0.04 | 1.37     | 0.11 | 1.07  | 0.07 | 1.38  | 0.11 | 0.92  | 0.04 | 1.27  | 0.30 |
| Religious groups                            | 2.51      | 0.06 | 2.63     | 0.16 | 2.44  | 0.08 | 2.72  | 0.18 | 2.56  | 0.06 | 1.86  | 0.19 |
| <b>Functional social support</b>            |           |      |          |      |       |      |       |      |       |      |       |      |
| <i>Total</i>                                | 30.25     | 0.06 | 29.52    | 0.14 | 30.22 | 0.07 | 29.48 | 0.15 | 30.28 | 0.07 | 29.88 | 0.33 |
| <i>Appraisal</i>                            | 10.33     | 0.02 | 9.96     | 0.06 | 10.22 | 0.03 | 9.91  | 0.06 | 10.40 | 0.03 | 10.44 | 0.13 |
| <i>Belonging</i>                            | 9.71      | 0.02 | 9.42     | 0.05 | 9.82  | 0.03 | 9.44  | 0.06 | 9.62  | 0.02 | 9.23  | 0.15 |
| <i>Tangible</i>                             | 10.22     | 0.02 | 10.13    | 0.05 | 10.17 | 0.03 | 10.13 | 0.05 | 10.26 | 0.03 | 10.21 | 0.11 |

SE=standard error

<sup>a</sup>Means and SEs account for survey sampling
